# Supplementary material for: Acupuncture for Acne Vulgaris: A Systematic Review and Meta‐Analysis
Source: Hindawi journal article supplement (doi:10.1155/2018/4806734), 2018-01-01
Supplement: f1 [file 4806734.f1.zip]

## Supplementary Files

**Supplementary Table 1: Therapeutic Effective Rate Criteria and Secondary Outcomes**

| First author, publication year | Therapeutic Effective Rate Criteria                                                                                                                                                                                                                                                                                                                                                                                                                                                                                                                          | Secondary outcomes reported                                                                                                                                                      |
|--------------------------------|--------------------------------------------------------------------------------------------------------------------------------------------------------------------------------------------------------------------------------------------------------------------------------------------------------------------------------------------------------------------------------------------------------------------------------------------------------------------------------------------------------------------------------------------------------------|----------------------------------------------------------------------------------------------------------------------------------------------------------------------------------|
| Han, 2010 [27]                 | 2002 guideline<br><u>Cure</u> : 90% lesions disappear, all clinical symptoms disappear;<br><u>Significant improvement</u> : 60%-89% lesions disappear, clinical symptoms significantly improved;<br><u>Improvement</u> : 30-59% lesions disappear, clinical symptoms improved;<br><u>No improvement</u> : <30% lesions disappear, or clinical symptoms worsen.                                                                                                                                                                                               | AE:<br>I: 4 cases of itchy sensation after acupuncture, 7 cases of ecchymosis, 5 cases of painful sensation;<br>C: 47 cases of dry mouth, 10 cases of dry skin and desquamation. |
| He, 2009 [28]                  | <u>Cure</u> : All lesions disappear;<br><u>Significant improvement</u> : >60% lesions disappear;<br><u>Improvement</u> : >30% lesions disappear;<br><u>No improvement</u> : <30% lesions disappear, or clinical symptoms worsen.                                                                                                                                                                                                                                                                                                                             | NS                                                                                                                                                                               |
| Li, 2002 [29]                  | Samuelson grading system<br>If grading >3:<br>- <u>Significant improvement</u> : grading decrease 3 levels;<br>- <u>Better improvement</u> : grading decrease 2 levels;<br>- <u>Improvement</u> : grading decrease 1 level;<br>- <u>No improvement</u> : grading no change;<br>- <u>Worsen</u> : if grading increase 1-2 levels.<br><br>If grading <3:<br>- <u>Significant improvement</u> : lesion count decrease 90%;<br>- <u>Better improvement</u> : lesion count decrease more than 70%;<br>- <u>Improvement</u> : lesion count decrease more than 50%. | NS                                                                                                                                                                               |
| Liu, 2011 [30]                 | <u>Cure</u> : >95% lesions disappear;<br><u>Significant improvement</u> : >60% lesions disappear;<br><u>Improvement</u> : >20% lesions disappear;<br><u>No improvement</u> : <20% lesions disappear.                                                                                                                                                                                                                                                                                                                                                         | NS                                                                                                                                                                               |
| Mo, 2005 [32]                  | Standard of diagnosis and therapeutic effect of TCM diseases<br>中医病证诊断疗效标准<br><u>Cure</u> : all lesions disappear, all clinical symptoms disappear;                                                                                                                                                                                                                                                                                                                                                                                                          | NS                                                                                                                                                                               |

| First author, publication year | Therapeutic Effective Rate Criteria                                                                                                                                                                                                                                                                                                                                                                    | Secondary outcomes reported                                                                                                                                        |
|--------------------------------|--------------------------------------------------------------------------------------------------------------------------------------------------------------------------------------------------------------------------------------------------------------------------------------------------------------------------------------------------------------------------------------------------------|--------------------------------------------------------------------------------------------------------------------------------------------------------------------|
|                                | <u>Significant improvement</u> : >70% lesions disappear, clinical symptoms significantly improved;<br><u>Improvement</u> : 30-70% lesions disappear, clinical symptoms improved;<br><u>No improvement</u> : <30% lesions disappear, or clinical symptoms worsen.                                                                                                                                       |                                                                                                                                                                    |
| Tang, 2011 [33]                | <u>Cure</u> : All lesions disappear;<br><u>Significant improvement</u> : >80% lesions disappear, new lesions <5, improvement of oily face, slight itchy sensation;<br><u>Improvement</u> : >30% lesions disappear, new lesions <10, slight improvement of oily face and itchy sensation;<br><u>No improvement</u> : <30% lesions disappear, or clinical symptoms worsen.                               | AE: C: 6 cases of gastrointestinal discomfort.                                                                                                                     |
| Wu, 2011 [34]                  | 2002 guideline<br><u>Cure</u> : all lesions disappear, no pigmentation left;<br><u>Significant improvement</u> : most of the lesions disappear, 70%-100% decrease of the scores (based on lesion count and severity);<br><u>Improvement</u> : part of the lesions disappear, 30-70% decrease of the scores;<br><u>No improvement</u> : no improvement of the lesions, and <30% of the scores decrease. | AE:<br>I: 5 cases of erubescence, 2 cases of ecchymosis, 6 cases of painful sensation;<br>C: 28 cases of dry mouth, 7 cases of dry skin and slightly desquamation. |
| Liu, 2015 [31]                 | 2002 Guideline:<br>Lesion score calculated as change from baseline.<br><u>Cure</u> : ≥95%<br><u>Most improved</u> : 70-94%<br><u>Improved</u> : 50-69%<br><u>Not improved</u> : <50%.                                                                                                                                                                                                                  | NS                                                                                                                                                                 |
| Zhang, 2014 [36]               | 1994 Guideline<br><u>Cure</u> : lesions and symptoms disappear;<br><u>Improved</u> : ≥30% lesions heal, symptoms improved;<br><u>Not improved</u> : <30% lesions heal, symptoms not improved.                                                                                                                                                                                                          | AE: I: 3 cases of acne pain.                                                                                                                                       |
| You, 2014 [35]                 | 2002 Guideline:<br>Lesion score calculated as change from baseline.<br><u>Cure</u> : ≥95%<br><u>Most improved</u> : 70-94%<br><u>Improved</u> : 50-69%<br><u>Not improved</u> : <50%.                                                                                                                                                                                                                  | Severity grading: GAGS                                                                                                                                             |

| First author, publication year | Therapeutic Effective Rate Criteria | Secondary outcomes reported                                   |
|--------------------------------|-------------------------------------|---------------------------------------------------------------|
| McKee, 2004 [38]               | Not applicable                      | Photographic grading.                                         |
| Kim, 2012 [37]                 | Not applicable                      | Skindex-29; photographic grading; Korean Acne Severity Scale. |

Key: I: Intervention; C: Control; AE: adverse events; GAGS: Global Acne Grading System; NS: Not stated

**Supplementary Table 2: Assessment of Reporting of STRICTA items**

| <u>Item</u>                     | <u>Detail</u>                                                                                                                                      | <u>Han</u><br><u>2010</u><br><u>[27]</u> | <u>He</u><br><u>2009</u><br><u>[28]</u> | <u>Li</u><br><u>2002</u><br><u>[29]</u> | <u>Liu 2011</u><br><u>[30]</u> | <u>Mo</u><br><u>2005</u><br><u>[32]</u> | <u>Tang</u><br><u>2011</u><br><u>[33]</u> | <u>Wu</u><br><u>2011</u><br><u>[34]</u> | <u>Liu</u><br><u>2015</u><br><u>[31]</u> | <u>Zhang</u><br><u>2014</u><br><u>[36]</u> | <u>You</u><br><u>2014</u><br><u>[36]</u> | <u>McKee</u><br><u>2004 [38]</u> | <u>Kim</u><br><u>2012</u><br><u>[37]</u> |
|---------------------------------|----------------------------------------------------------------------------------------------------------------------------------------------------|------------------------------------------|-----------------------------------------|-----------------------------------------|--------------------------------|-----------------------------------------|-------------------------------------------|-----------------------------------------|------------------------------------------|--------------------------------------------|------------------------------------------|----------------------------------|------------------------------------------|
| <b>1. Acupuncture rationale</b> | 1a) Style of acupuncture (e.g. Traditional Chinese Medicine, Japanese, Korean, Western medical, Five Element, ear acupuncture, etc)                | Y                                        | Y                                       | Y                                       | Y                              | Y                                       | Y                                         | Y                                       | Y                                        | Y                                          | Y                                        | Y                                | Y                                        |
|                                 | 1b) Reasoning for treatment provided, based on historical context, literature sources, and/or consensus methods, with references where appropriate | Y                                        | N                                       | N                                       | N                              | N                                       | N                                         | N                                       | N                                        | N                                          | N                                        | Y                                | Y                                        |
|                                 | 1c) Extent to which treatment was varied                                                                                                           | N                                        | Y                                       | Y                                       | Y                              | N                                       | N                                         | Y                                       | Y                                        | Y                                          | Y                                        | Y                                | Y                                        |
| <b>2. Details of needling</b>   | 2a) Number of needle insertions per subject per session (mean and range where relevant)                                                            | N                                        | N                                       | N                                       | NA<br>(auricular)              | N                                       | N                                         | N                                       | N                                        | NA<br>(plum blossom needle)                | N                                        | Y                                | Y                                        |
|                                 | 2b) Names (or location if no standard name) of points used (uni/bilateral)                                                                         | Y                                        | Y                                       | Y                                       | NA                             | Y                                       | Y                                         | Y                                       | Y                                        | NA                                         | Y                                        | Y                                | Y                                        |
|                                 | 2c) Depth of insertion, based on a specified unit of measurement, or on a particular tissue level                                                  | N                                        | N                                       | Y                                       | NA                             | N                                       | N                                         | N                                       | N                                        | NA                                         | N                                        | Auricular                        | Y                                        |
|                                 | 2d) Response sought (e.g. <i>de qi</i> or muscle twitch response)                                                                                  | N                                        | N                                       | N                                       | NA                             | N                                       | N                                         | N                                       | Y                                        | NA                                         | Y                                        | Auricular                        | N                                        |

[illegible]

| <u>Item</u>                                   | <u>Detail</u>                                                                                                                                                               | <u>Han<br/>2010<br/>[27]</u> | <u>He<br/>2009<br/>[28]</u> | <u>Li<br/>2002<br/>[29]</u> | <u>Liu 2011<br/>[30]</u> | <u>Mo<br/>2005<br/>[32]</u> | <u>Tang<br/>2011<br/>[33]</u> | <u>Wu<br/>2011<br/>[34]</u> | <u>Liu<br/>2015<br/>[31]</u> | <u>Zhang<br/>2014<br/>[36]</u> | <u>You<br/>2014<br/>[36]</u> | <u>McKee<br/>2004 [38]</u> | <u>Kim<br/>2012<br/>[37]</u> |
|-----------------------------------------------|-----------------------------------------------------------------------------------------------------------------------------------------------------------------------------|------------------------------|-----------------------------|-----------------------------|--------------------------|-----------------------------|-------------------------------|-----------------------------|------------------------------|--------------------------------|------------------------------|----------------------------|------------------------------|
| <b>6. Control or comparator interventions</b> | 6a) Rationale for the control or comparator in the context of the research question, with sources that justify this choice                                                  | N                            | N                           | N                           | N                        | N                           | N                             | N                           | N                            | N                              | N                            | N                          | N                            |
|                                               | 6b) Precise description of the control or comparator. If sham acupuncture or any other type of acupuncture-like control is used, provide details as for Items 1 to 3 above. | Y                            | Y                           | Y                           | Y                        | Y                           | Y                             | Y                           | Y                            | Y                              | Y                            | Y                          | Y                            |

Key: Y: Yes; N: No; NA: Not applicable
