# Supplementary material for: Acupuncture for Acne Vulgaris: A Systematic Review and Meta-Analysis
Source: Evid Based Complement Alternat Med. 2018 Mar 12;2018:4806734. doi: 10.1155/2018/4806734 (PMC5867647; doi:10.1155/2018/4806734)
Supplement: Supplementary Materials — Supplementary Table 1: therapeutic effective rate criteria and secondary outcomes. Supplementary Table 2: assessment of reporting of STRICTA items. [file 4806734.f1.zip]

Archive with 2 entries (2 files):
- Supplementary Files Tables 1 and 2 ECAM_ECAM_2156204.docx
- Supplementary Files Tables 1 and 2 ECAM_ECAM_2156205.pdf
